# Supplementary material
Source: Springer Nature journal article supplement (https://www.springermedizin.de/resource/supplementary/12889_2010_2535_MOESM2_ESM.pdf/9486336)
Supplement: MOESM2 [file 9486336]

Born in hospital N=635

**Excluded N=102**

Mother too unwell (N=35)

Baby in poor health (N=24)

Baby died (N=2)

Hospital too busy (N=17)

**Refused N=4**

**RECRUITED IN HOSPITAL**

**Day 1: N=529**

Revisited at home N=252

**Not accessed N=69**

Not traced (N=10)

Not at home on visit : (N=49)

Baby died (N=2)

**Refused N= 8**

**RECRUITED AT HOME**

**Day 5: N=183**
